# Supplementary material
Source: PubMed Central journal article supplement (PMC2756053)
Supplement: NIHMS127591-supplement-CFTR.pdf [file NIHMS127591-supplement-CFTR.pdf]

SI Guide for Gadsby ms 25186

1)

File name: GadsbySupplNotes.doc

Title: Supplementary Notes: Thermodynamic double mutant cycles

Derivation of equations used to quantify energetic coupling.

(MS Word document, 80 kB)

2)

File name: GadsbySupplTable.doc

Title: Supplementary Table: Kinetic Parameters of WT and mutant CFTR channels

Part A: kinetic parameters describing single-channel gating, obtained from patches containing a small number of channels (e.g. Figs. 2c, 3b and 4b).

Part B: Current decay time-constants, obtained from patches containing hundreds of channels (e.g. Fig 1b).

(MS Word document, 28 kB)



$$\Delta\Delta G_{\text{int}} = (G_{2\text{ IV}} - G_{2\text{ II}} - G_{2\text{ III}} + G_{2\text{ I}}) - (G_{1\text{ IV}} - G_{1\text{ II}} - G_{1\text{ III}} + G_{1\text{ I}})$$

$$\Delta\Delta G_{\text{int}} = (\Delta G_{2\text{ IV-II}} - \Delta G_{2\text{ III-I}}) - (\Delta G_{1\text{ IV-II}} - \Delta G_{1\text{ III-I}})$$

The quantity within the first bracket, can be thought of as the coupling in state 2, the difference between changes on parallel sides of a cycle resulting from an “alchemical” linking of states 2 for WT, single mutants and double mutant. Similarly, the terms within the second bracket represent coupling in state 1, so that:

$$\Delta\Delta G_{\text{int}} = \Delta\Delta G_{\text{int } 2} - \Delta\Delta G_{\text{int } 1}$$

Therefore, the sign of  $\Delta\Delta G_{\text{int}}$  will give information on the relative strength of energetic coupling in state 2 and state 1. For example, if the single mutations disrupt a stabilizing interaction in both states, the  $\Delta\Delta G_{\text{int } 2}$  and  $\Delta\Delta G_{\text{int } 1}$  values are negative, and a negative sign of the global  $\Delta\Delta G_{\text{int}}$  indicates that such interactions are stronger in state 2 than in state 1 (e.g. **Fig.4a** and **d**). However, a negative overall  $\Delta\Delta G_{\text{int}}$  will also result if the single mutations disrupt destabilizing interactions ( $\Delta\Delta G_{\text{int } 1}$  and  $\Delta\Delta G_{\text{int } 2}$  values are positive) but the disrupted interactions are stronger in state 1 than in state 2.

When the kinetic measurement used is the rate of a process (e.g. channel opening rate) the derivation above can be used, substituting the ground state and the transition state for that process as state 1 and state 2, respectively. Transition state theory, developed for bonds obeying quantum theory, relates the rate of a chemical reaction to the reaction’s  $\Delta G^\ddagger$ . This theory can be extended to the kinetics of complex conformational changes in proteins as long as the quantities of interest are *changes* in barrier heights, thus eliminating uncertainties regarding the magnitude of the pre-exponential factor (Fersht, 1999).

Coupling energy can be partitioned into several components, direct interactions between the target side-chains being only one of them, and interactions of the targets with the rest of the protein and with solvent and ligand often making important contributions to  $\Delta\Delta G_{\text{int}}$  (Serrano, 1990). The coupling energies measured here are within the very wide range of energy values attributed to hydrogen bonds within proteins (Fersht, 1999), but an increase, upon channel opening, in coupling energy mediated by indirect interactions would be equally consistent with our conclusions.

**Kinetic parameters of WT and mutant CFTR channels****A**

|             | <b>WT</b>       |    | <b>R555K</b>    |    |
|-------------|-----------------|----|-----------------|----|
|             | mean $\pm$ SEM  | n  | mean $\pm$ SEM  | n  |
| $\tau_b$    | 432 $\pm$ 20    | 32 | 387 $\pm$ 39    | 26 |
| $\tau_{ib}$ | 2288 $\pm$ 458  | 16 | 8531 $\pm$ 1227 | 15 |
| $\tau_F$    | 16.2 $\pm$ 2.3  | 32 | 19.9 $\pm$ 3.0  | 26 |
| $n_F$       | 0.77 $\pm$ 0.10 | 32 | 0.95 $\pm$ 0.19 | 26 |
| $r_{CO}$    | 0.65 $\pm$ 0.09 | 16 | 0.16 $\pm$ 0.02 | 15 |
| $r_{OC}$    | 2.67 $\pm$ 0.22 | 32 | 3.22 $\pm$ 0.25 | 26 |

  

|             | <b>T1246N</b>     |    | <b>R555K T1246N</b> |    |
|-------------|-------------------|----|---------------------|----|
|             | mean $\pm$ SEM    | n  | mean $\pm$ SEM      | n  |
| $\tau_b$    | 1,196 $\pm$ 350   | 14 | 2,323 $\pm$ 142     | 16 |
| $\tau_{ib}$ | 26,883 $\pm$ 5180 | 7  | 7,441 $\pm$ 1785    | 7  |
| $\tau_F$    | 34.5 $\pm$ 6.6    | 14 | 29.5 $\pm$ 3.2      | 16 |
| $n_F$       | 0.95 $\pm$ 0.16   | 14 | 1.86 $\pm$ 0.14     | 16 |
| $r_{CO}$    | 0.06 $\pm$ 0.02   | 7  | 0.18 $\pm$ 0.04     | 7  |
| $r_{OC}$    | 1.30 $\pm$ 0.16   | 14 | 0.21 $\pm$ 0.03     | 16 |

Rates ( $r_{CO}$ : opening rate;  $r_{OC}$ : closing rate) and derived parameters ( $\tau_b$ : burst duration;  $\tau_{ib}$ : interburst duration;  $\tau_F$ : duration of flickery closure;  $n_F$ : number of flickers per burst) were obtained from maximum likelihood fit of dwell-time histograms at all conductance levels. (Csanády, 2000). Channels were activated to a steady state, by application of 5 mM MgATP + 300 nM PKA. Durations are given in ms and rates in  $s^{-1}$ .

**B**

|        | <b>K1250R</b>   |    | <b>R555K K1250R</b> |    |
|--------|-----------------|----|---------------------|----|
|        | mean $\pm$ SEM  | n  | mean $\pm$ SEM      | n  |
| $\tau$ | 9,323 $\pm$ 515 | 49 | 27,266 $\pm$ 4,439  | 25 |

  

|        | <b>T1246N K1250R</b> |    | <b>R555K T1246N K1250R</b> |    |
|--------|----------------------|----|----------------------------|----|
|        | mean $\pm$ SEM       | n  | mean $\pm$ SEM             | n  |
| $\tau$ | 15,772 $\pm$ 2,543   | 11 | 55,646 $\pm$ 10,782        | 11 |

Time constants (in ms) were obtained from least squares fit of macroscopic current decay, after activation with 5 mM MgATP + 300 nM PKA.
